# Supplementary material for: Quantifying biolipid (rhamnolipid) effects on the aggregation behavior of engineered nanoparticles
Source: Royal Society of Chemistry journal article supplement (doi:10.1039/d5en00376h), 2025-01-01
Supplement: d5en00376h1.pdf [file d5en00376h1.pdf]

[Supplementary material]

# Quantifying Biolipid (Rhamnolipid) Effects on the Aggregation Behavior of Engineered Nanoparticles

Anushree Ghosh<sup>a,b</sup>, Neha Sharma<sup>c</sup>, Junseok Lee<sup>d</sup>, Wenlu Li<sup>e</sup>, Ji-Won Son<sup>f</sup>, Changwoo Kim<sup>f</sup>,  
Natalie L. Cápiro<sup>g</sup>, Kurt Pennell<sup>h</sup>, Kimberly M. Parker<sup>b</sup> and John D. Fortner<sup>a,\*</sup>

<sup>a</sup> *Department of Chemical and Environmental Engineering, Yale University, New Haven, CT 06520, USA*

<sup>b</sup> *Department of Energy, Environmental and Chemical Engineering, Washington University in St. Louis, St. Louis, MO 63130, USA*

<sup>c</sup> *Stanford University, Department of Chemical Engineering, Stanford, CA, USA*

<sup>d</sup> *Department of Environmental Engineering, Incheon National University, 119 Academyro, Yeonsugu, Incheon, Korea*

<sup>e</sup> *School of Ecology and Environment, Northwestern Polytechnical University, Xi'an 710072, China*

<sup>f</sup> *School of Earth Science and Environmental Engineering, Gwangju Institute of Science and Technology, Gwangju, Korea*

<sup>g</sup> *Department of Biological & Environmental Engineering, Cornell University, Ithaca, NY 14853, USA*

<sup>h</sup> *School of Engineering, Brown University, Providence, RI 02912, USA*

\*To whom correspondence should be addressed:

John D. Fortner: Tel: +1-314-935-9293; Email: [john.fortner@yale.edu](mailto:john.fortner@yale.edu)

**Table S1:** Optimized Ligand concentration based on yield (%) of Fe transferred, hydrodynamic diameter(nm), number of surfactant molecules/IONP.

| <b>Ligand</b> | <b>Optimized Concentration(mM)</b> | <b>Optimized Sonication time (min)</b> | <b>Yield of Fe transferred</b> | <b>Number mean Hydrodynamic diameter (nm)</b> | <b>No. of ligands/IONP</b> |
|---------------|------------------------------------|----------------------------------------|--------------------------------|-----------------------------------------------|----------------------------|
| <b>CTAB</b>   | 5                                  | 4                                      | 74.48%                         | $14.4 \pm 3.08$                               | $718 \pm 72$               |
| <b>SDBS</b>   | 10                                 | 6                                      | 88.23%                         | $15.66 \pm 2.8$                               | $830 \pm 100$              |

**Table S2:** Adsorption isotherm parameters of MonoRL and DiRL adsorbed on SDBS and CTAB-IONP.

| Nanoparticle | Glycolipid | Langmuir            | Freundlich      | Redlich-Peterson    | Sips                  |
|--------------|------------|---------------------|-----------------|---------------------|-----------------------|
| CTAB-IONP    | MonoRL     | $Q_{\max} = 7073.7$ | $K_F = 261.94$  | $K_R = 171.94$      | $K_S = 1.4799$        |
|              |            | $K_L = 0.05$        | $n = 1.3$       | $\beta = 2.39$      | $\beta_S = 3.026$     |
|              |            | $R^2 = 0.5$         | $R^2 = 0.78$    | $\alpha = 0.000035$ | $\alpha_S = 0.000227$ |
|              |            |                     |                 | $R^2 = 0.75$        | $R^2 = 0.996$         |
|              | DiRL       | $Q_{\max} = 1944$   | $K_F = 260.96$  | $K_R = 146.53$      | $K_S = 0.129$         |
|              |            | $K_L = 0.098$       | $n = 2.05$      | $\beta = 1.577$     | $\beta_S = 6.63$      |
|              |            | $R^2 = 0.59$        | $R^2 = 0.56$    | $\alpha = 0.0087$   | $\alpha_S = 0.00009$  |
|              |            |                     |                 | $R^2 = 0.63$        | $R^2 = 0.99$          |
| SDBS-IONP    | MonoRL     | $Q_{\max} = 454847$ | $K_F = 12.6$    | $K_R = 107.7$       | $K_S = 6.56$          |
|              |            | $K_L = 0.00024$     | $n = 0.64$      | $\beta = 2.34$      | $\beta_S = 1.76$      |
|              |            | $R^2 = 0.74$        | $R^2 = 0.997$   | $\alpha = 8.9E-09$  | $\alpha_S = 0.00018$  |
|              |            |                     |                 | $R^2 = 0.74$        | $R^2 = 0.995$         |
|              | DiRL       | $Q_{\max} = 396936$ | $K_F = 0.00009$ | $K_R = 85.84$       | $K_S = 3.39$          |
|              |            | $K_L = 0.0002$      | $n = 0.187$     | $\beta = 0.0001$    | $\beta_S = 2.016$     |
|              |            | $R^2 = 0.48$        | $R^2 = 0.91$    | $\alpha = 0.00001$  | $\alpha_S = 0.00001$  |
|              |            |                     |                 | $R^2 = 0.48$        | $R^2 = 0.58$          |

**†Langmuir isotherm (equation 1):** It assumes homogeneous adsorption such that all sites possess equal affinity for the adsorbate. No adsorption takes place at a site on which the adsorbate is already adsorbed. where  $Q_e$  is the amount of adsorbate adsorbed (mg/g);  $Q_{\max}$  is the maximum amount adsorbed,  $K_L$  is the Langmuir equilibrium constant and  $C_e$  is the residual/equilibrium concentration of the RLs.

$$Q_e = \frac{Q_{\max} K_L C_e}{1 + K_L C_e} \quad (1)$$

**Freundlich isotherm (equation 2):** It assumes that the solute adsorption occurs on the adsorbent by multilayer adsorption and the adsorbent surface is composed of heterogeneous sites. where,  $K_F$  and  $n$  are the Freundlich adsorption constants related to sorption capacity and sorption intensity, respectively.

$$Q_e = K_F C_e^{1/n} \quad (2)$$

**Redlich Peterson (equation 3):** This model combines features of both Langmuir and Freundlich isotherms and is a three parameters multilayer sorption model. At low concentrations, it approaches Langmuir adsorption isotherm (as the  $\beta$  value tends to one) and at high concentration it approaches Freundlich adsorption isotherm. Here,  $K_r$ ,  $\alpha$  and  $\beta$  are Redlich-Peterson isotherm constants.

$$Q_e = \frac{K_r C_e}{1 + \alpha C_e^\beta} \quad (3)$$

**Sips (equation 4):** Like Redlich Peterson, this is a three-parameter multilayer model. At low adsorbate concentrations, this model reduces to Freundlich isotherm, while at high concentrations, it predicts a monolayer adsorption capacity characteristic of the Langmuir isotherm. Here,  $K_s$ ,  $\alpha_s$ ,  $\beta_s$  are Sips constant.

$$Q_e = \frac{K_s C_e^{\beta_s}}{1 + \alpha_s C_e^{\beta_s}} \quad (4)$$

**Table S3:** Grafting density of MonoRL and DiRL on CTAB-IONP.

|               |              | No. of RLs/IONP | No. of RLs per CTAB grafted on IONP (2 <sup>nd</sup> layer has been calculated as- No. of RLs in second layer/No. of RLs in first layer) |
|---------------|--------------|-----------------|------------------------------------------------------------------------------------------------------------------------------------------|
| <b>MonoRL</b> | First layer  | 1325 ± 178      | 1.85 ± 0.24                                                                                                                              |
|               | Second layer | 1432 ± 294      | 1.08 ± 0.41                                                                                                                              |
|               |              |                 |                                                                                                                                          |
| <b>DiRL</b>   | First layer  | 829 ± 54.3      | 1.15 ± 0.08                                                                                                                              |
|               | Second layer | 681 ± 207       | 0.82 ± .29                                                                                                                               |

As proposed in model Figure 4, the first layer of rhamnolipid is assumed to be formed just before the nanoparticles aggregates and becomes hydrophobic as shown in Fig 3 (12.5mg OC/l of DiRL and 20mg OC/l of MonoRL) and the subsequent second layer is where the IONP becomes stable again (50mg OC/l of MonoRL and DiRL is assumed). Each IONP is surrounded by  $718 \pm 72$  CTAB ligands as shown in the SI and is used to calculate the number of rhamnolipid molecules attached per CTAB ligand for the first monolayer. The second layer is assumed to be formed on the already formed rhamnolipid monolayer.

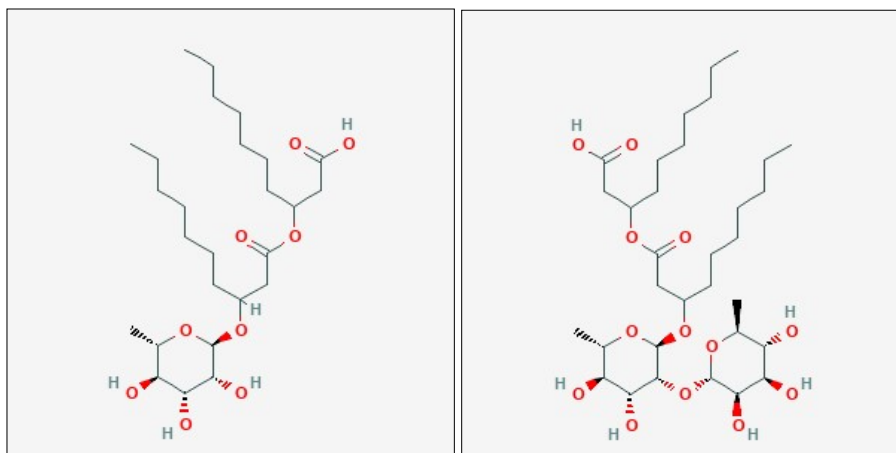

Figure S1. Chemical structure of MonoRL on the left and DiRL on the right.<sup>1,2</sup>

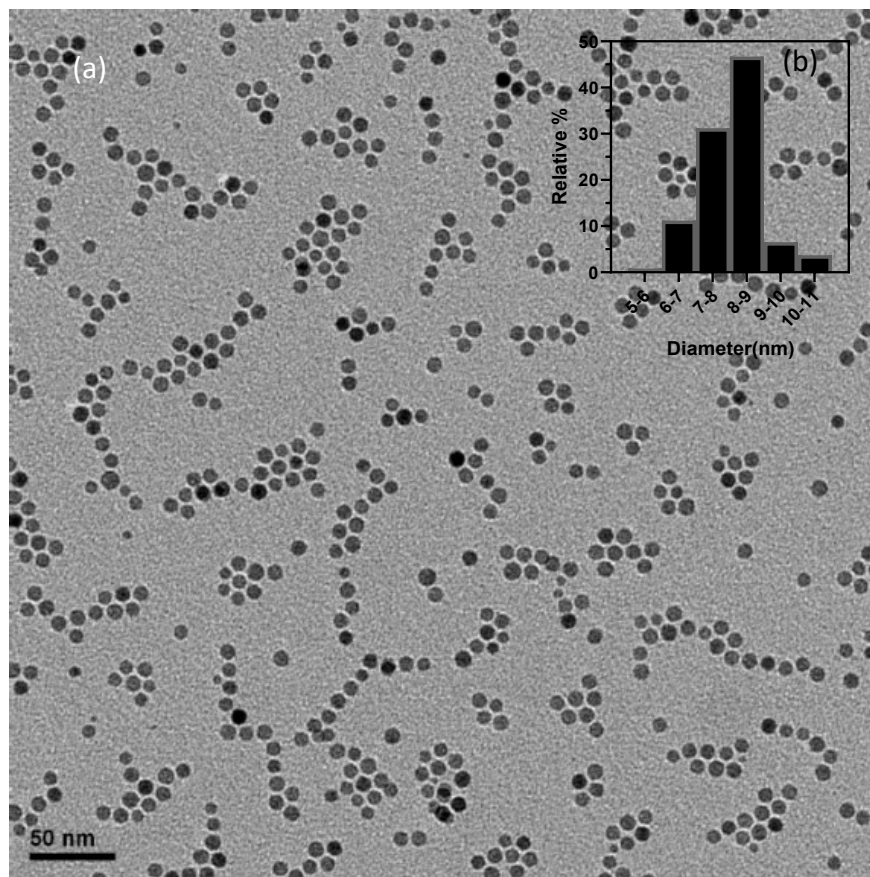

Figure S2: TEM image for (a) Oleic acid coated nanoparticles in hexane and (b) Relative% Vs Diameter in nm analyzed by using ImageJ software.

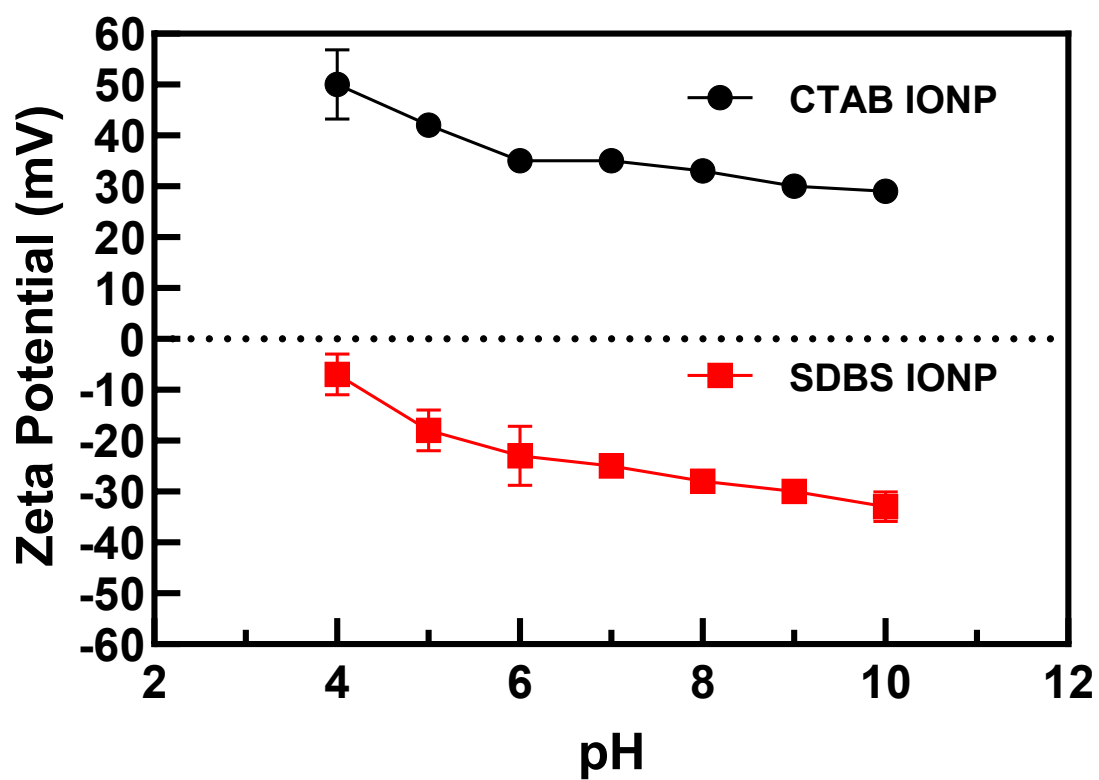

Figure S3: Zeta potential (mV) as a function of pH for CTAB-IONP and SDBS-IONP.



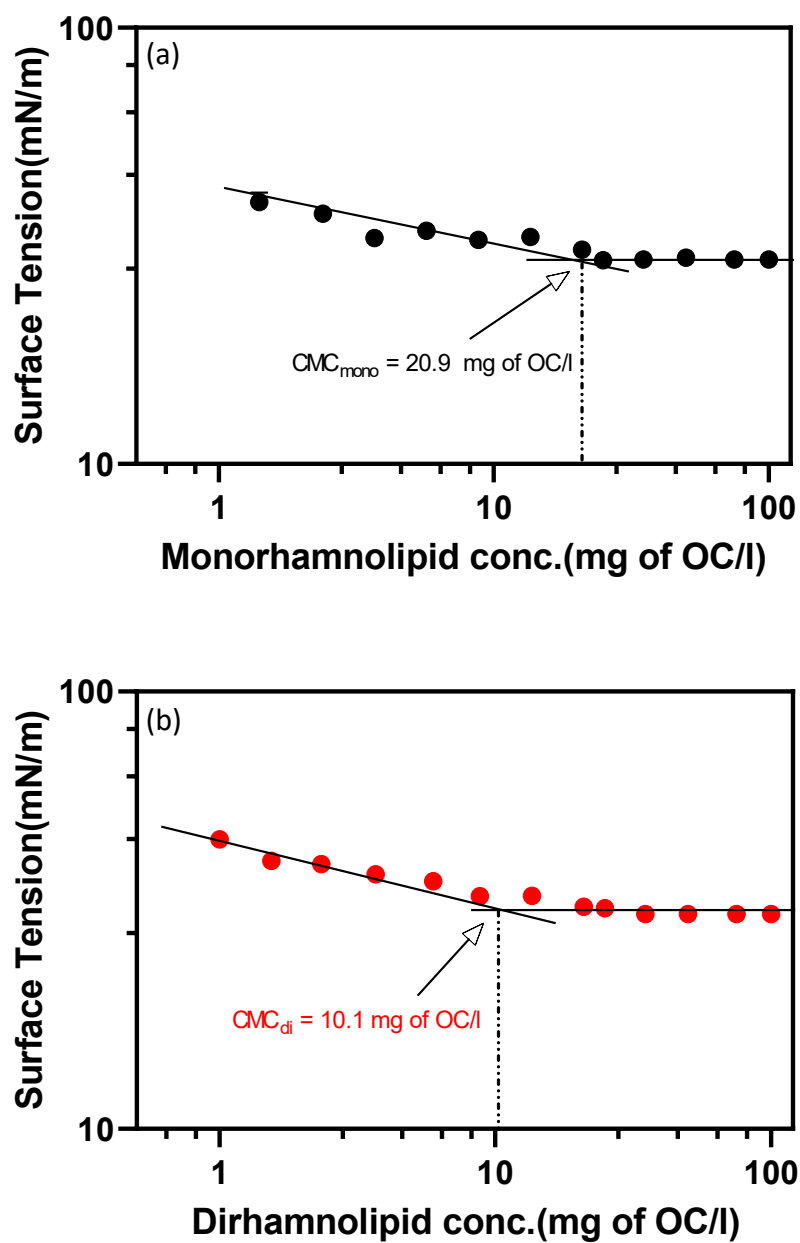

Figure S4: Log-log plot of surface tension Vs (a) MonoRL and (b) DiRL concentration. The CMC value of MonoRL and DiRL are 20.9 and 10.1mg of OC/l respectively.

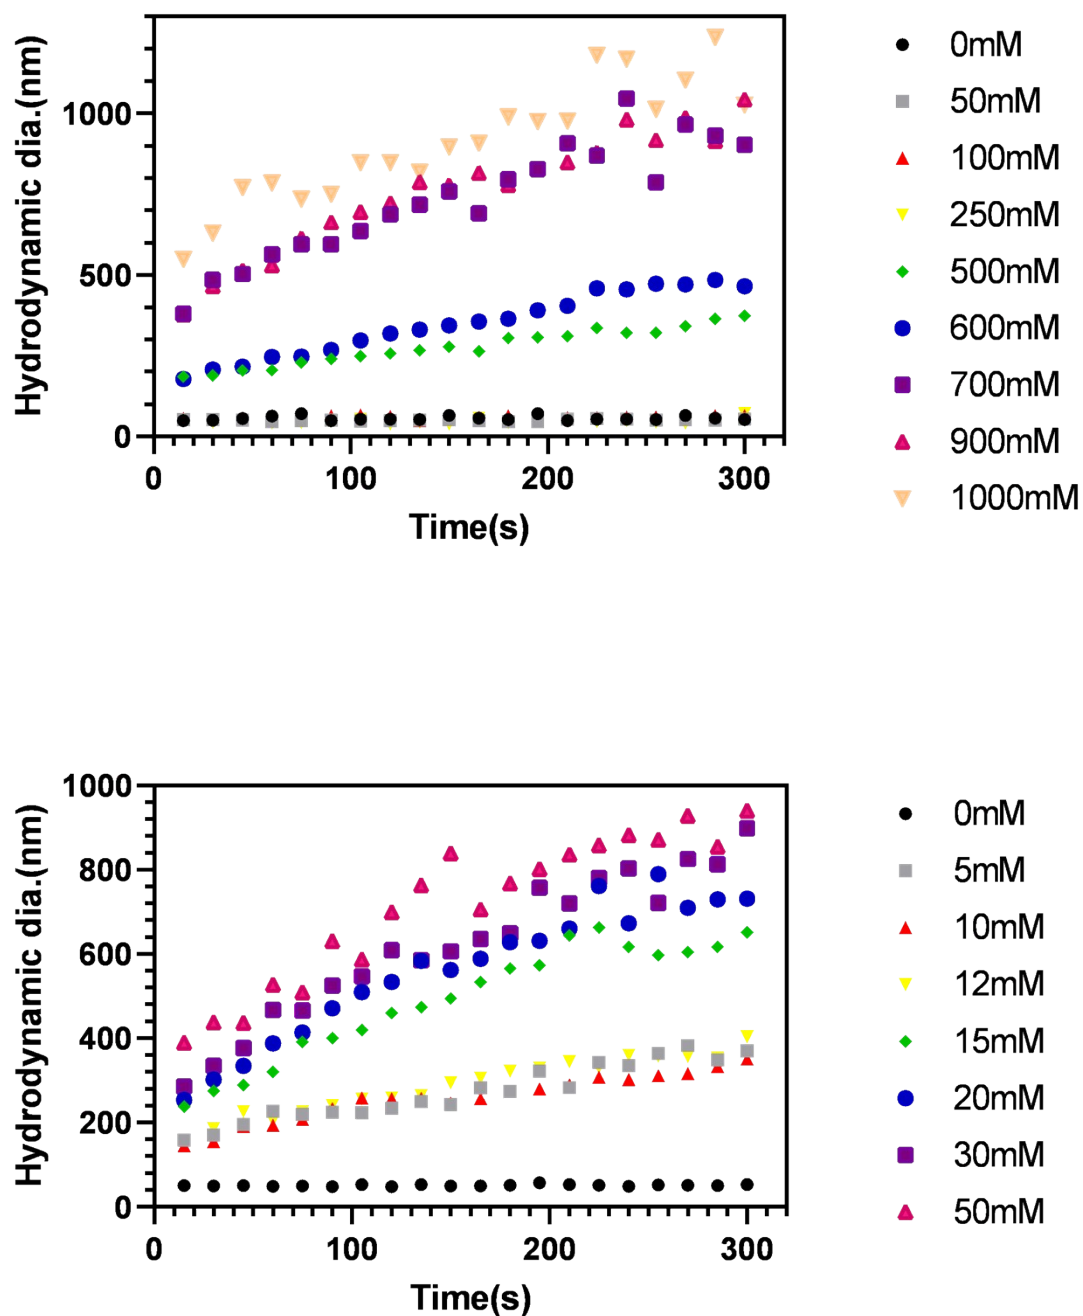

Figure S5: Intensity mean hydrodynamic diameter change with time for SDBS-IONP. (a) on addition of NaCl and (b) MgCl<sub>2</sub>. 700mM and 15mM of NaCl and MgCl<sub>2</sub> is the CCC value after which the IONPs undergo diffusion limited aggregation.

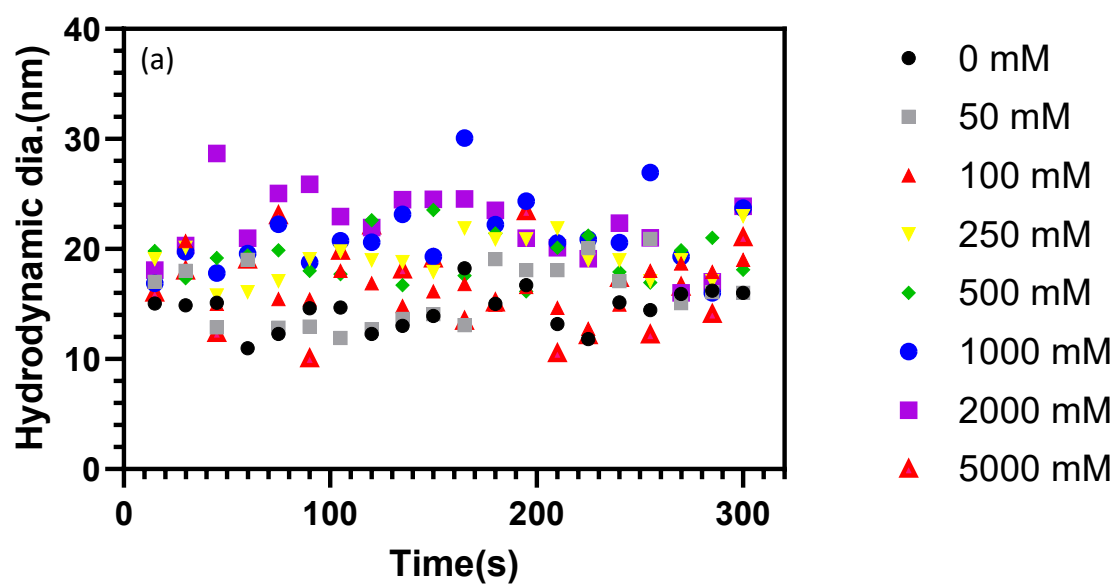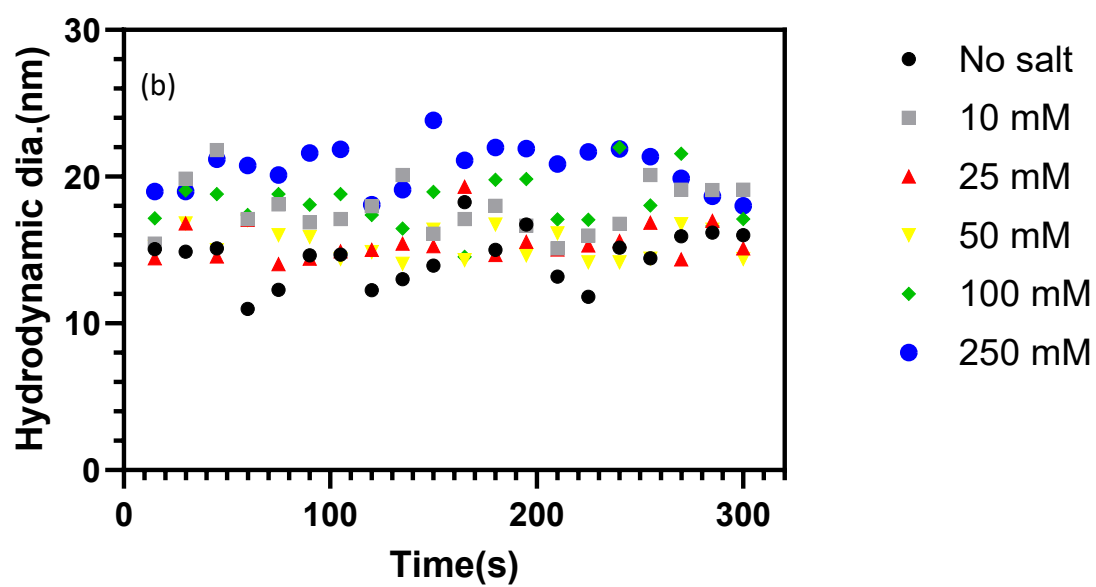

Figure S6: Number mean hydrodynamic diameter change with time for CTAB-IONP. (a) on addition of NaCl and (b)  $\text{Na}_2\text{SO}_4$ .

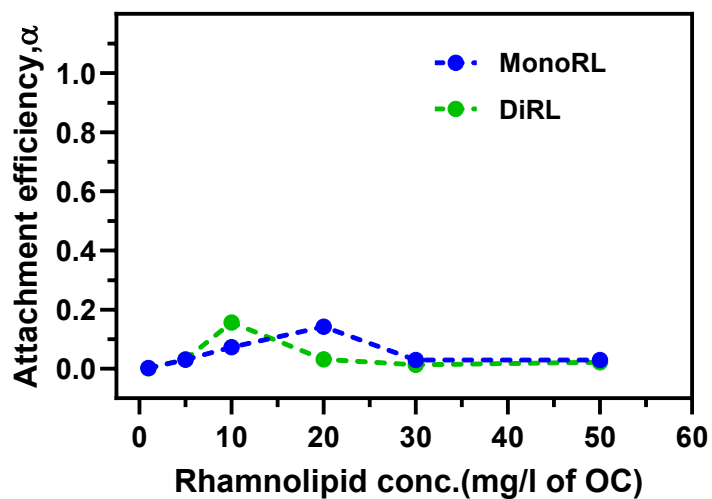

Figure S7: Attachment efficiency of 10mg/l of SDBS-IONP as a function of Rhamnolipid concentration.

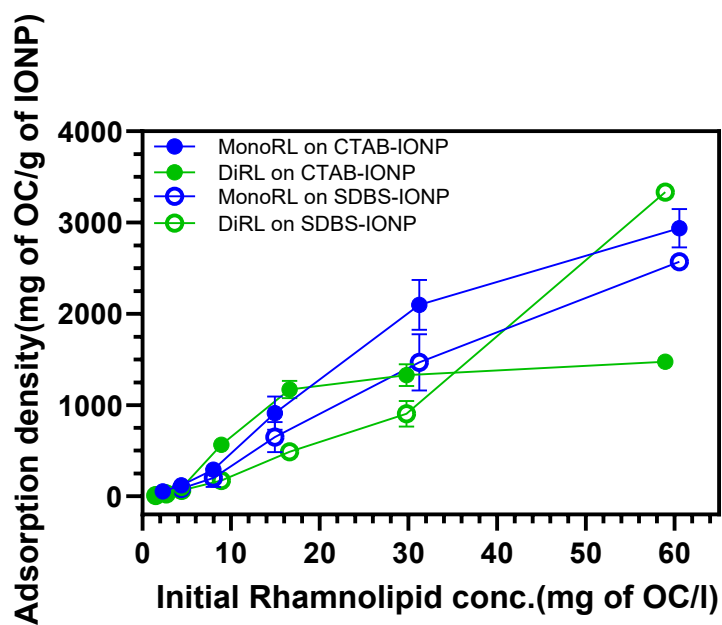

Figure S8: Adsorption density Vs initial conc. of Rhamnolipids.

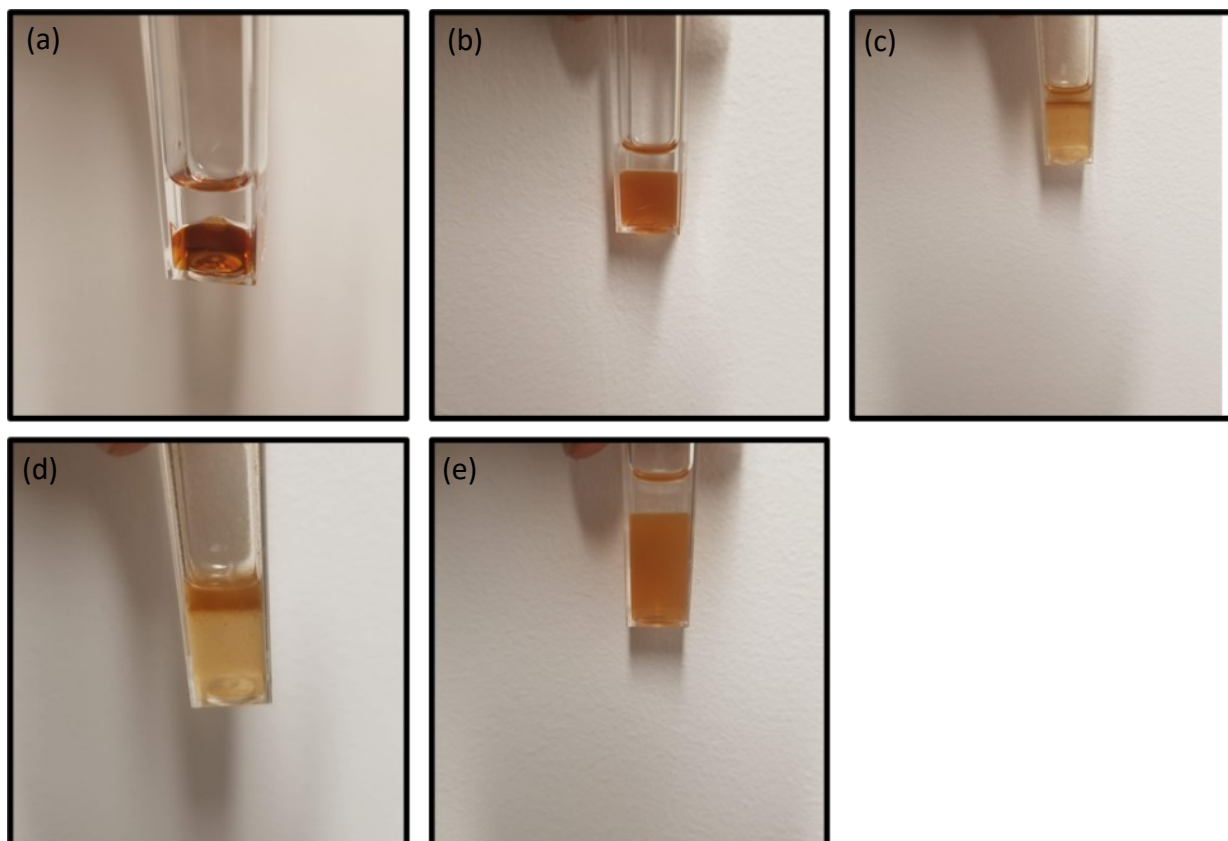

Figure S9: Partitioning of CTAB-IONP in hexane in presence of DiRL. (a) No DiRL (b) 0.5:1 (c) 1:1 (d) 1.5:1, and (e) 3:1 ratio of DiRL to CTAB-IONP. The upper layer is that of hexane and addition of rhamnolipid at point (c) and (d) causes partitioning of CTAB-IONPs to hexane phase. At highest concentrations of DiRL there is no partitioning visible.

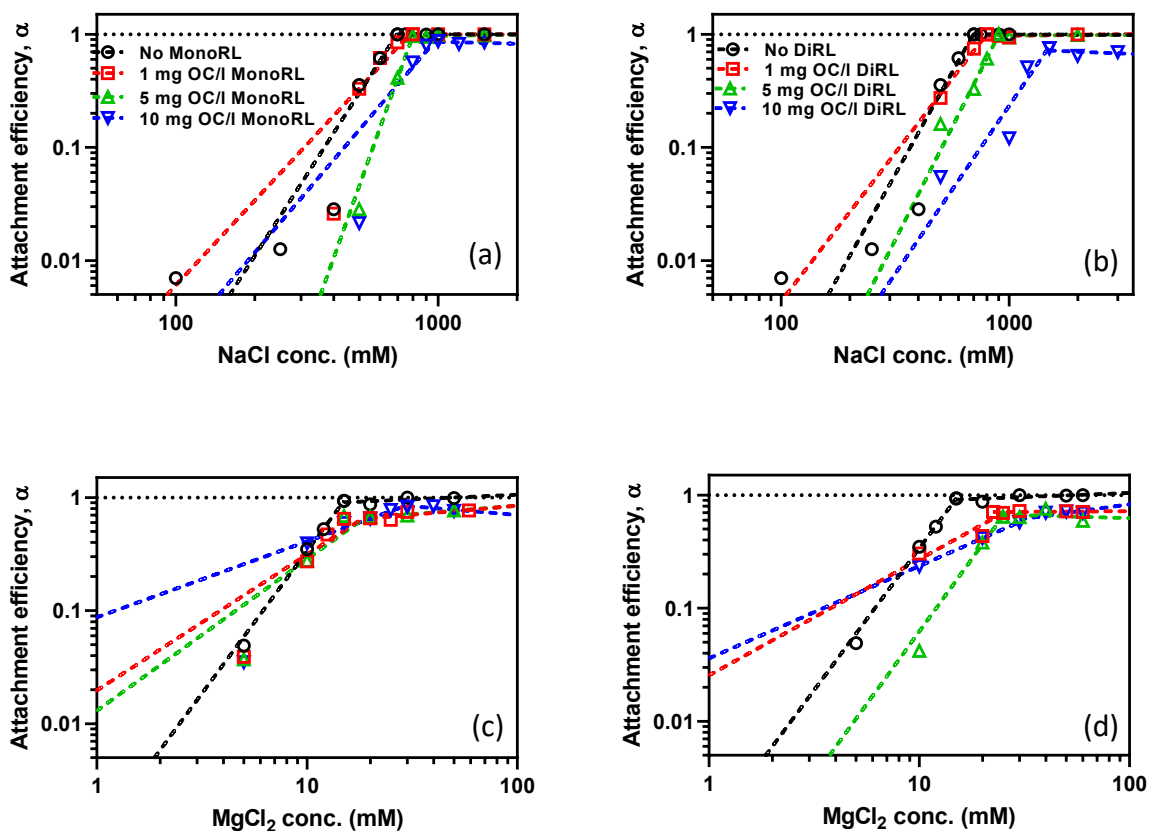

Figure S10: Attachment efficiency of SDBS-IONPs at PH 7.2 in presence of (a) MonoRL and NaCl, (b) DiRL and NaCl, (c) MonoRL and MgCl<sub>2</sub> and (d) DiRL and MgCl<sub>2</sub> where the black hollow rounds, red hollow square, green hollow triangle and blue inverted hollow triangle shows the no rhamnolipids, 1,5,10mg/l of OC respectively

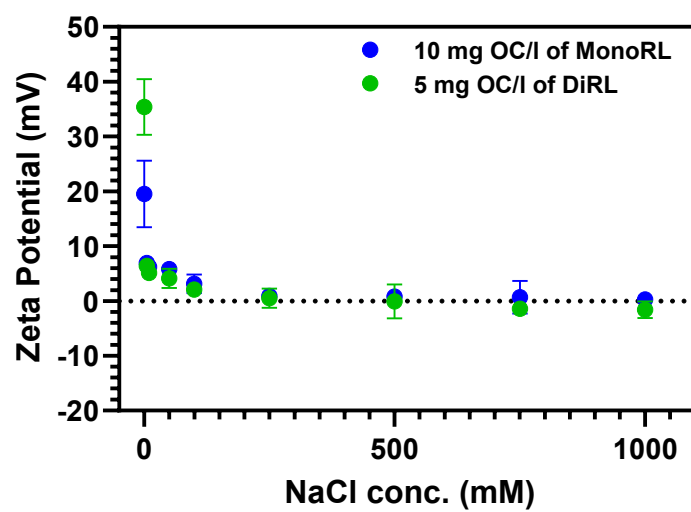

Figure S11: Zeta potential vs NaCl concentration (mM) In Regime 1 for points A of monoRL (10 mg/L of OC) and diRL (5 mg/L of OC).

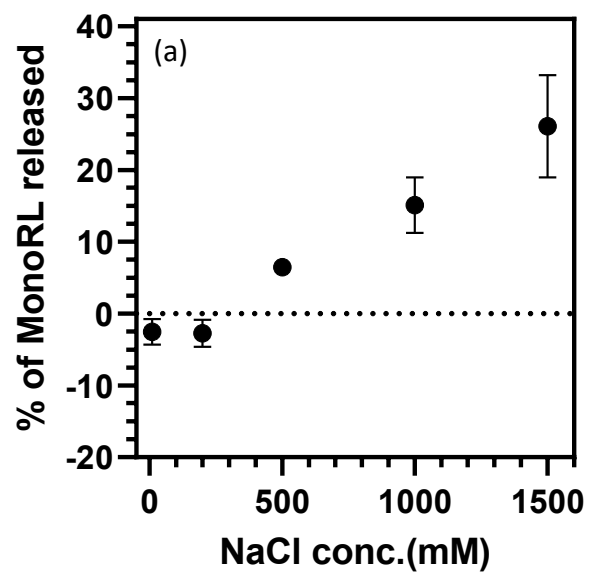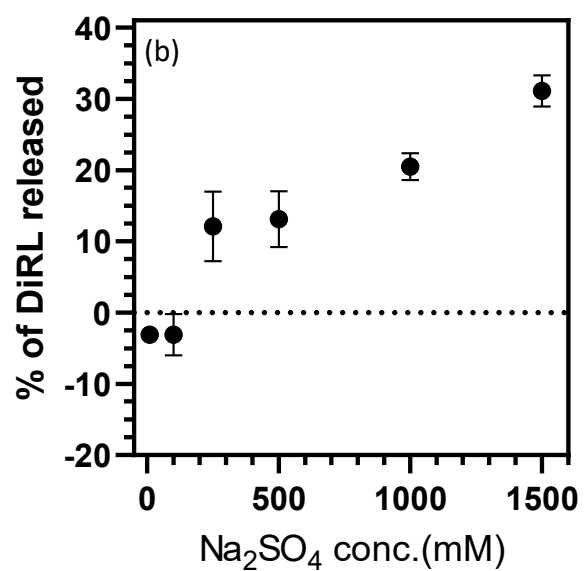

Figure S12: Percentage of (a) MonoRL and (b) DiRL released from CTAB-IONP on addition of NaCl.



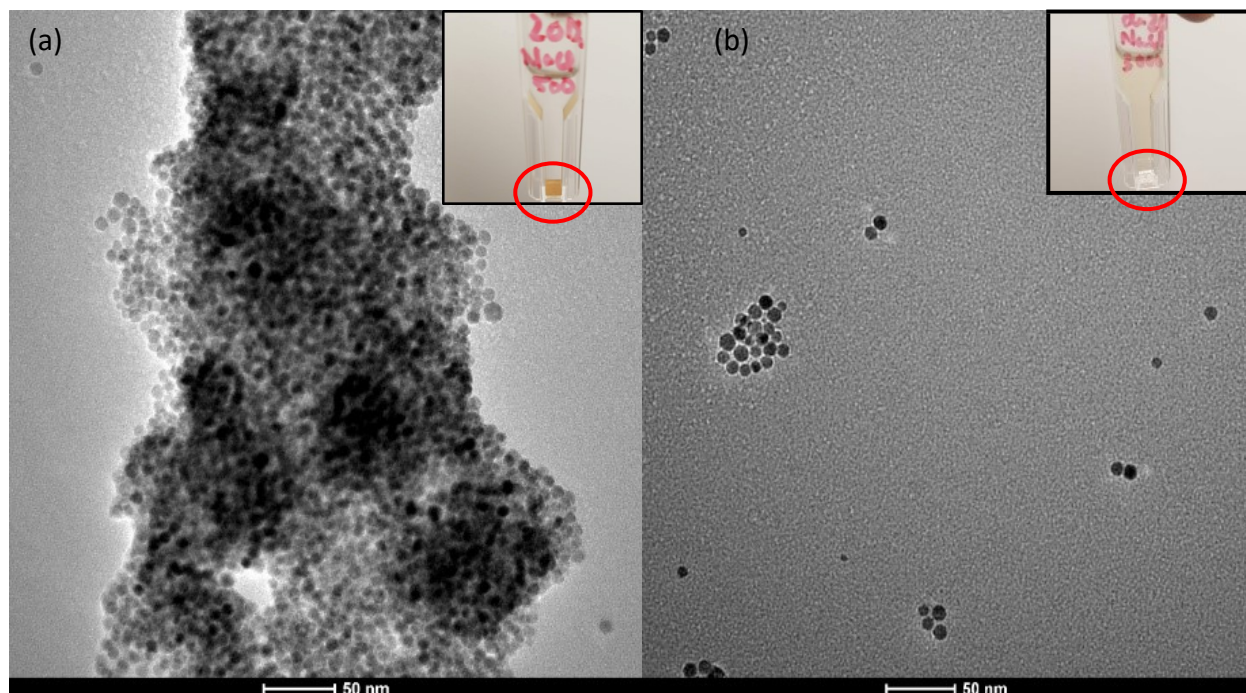

Figure S13: Representative TEM image of CTAB-IONP in presence of 20mg/l of OC MonoRL at 500mM NaCl conc. in the left and 2000mM in the right collected after 1 h after the start of reaction. Macroscopic view of the samples are attached at the top right which were collected after 12 h.

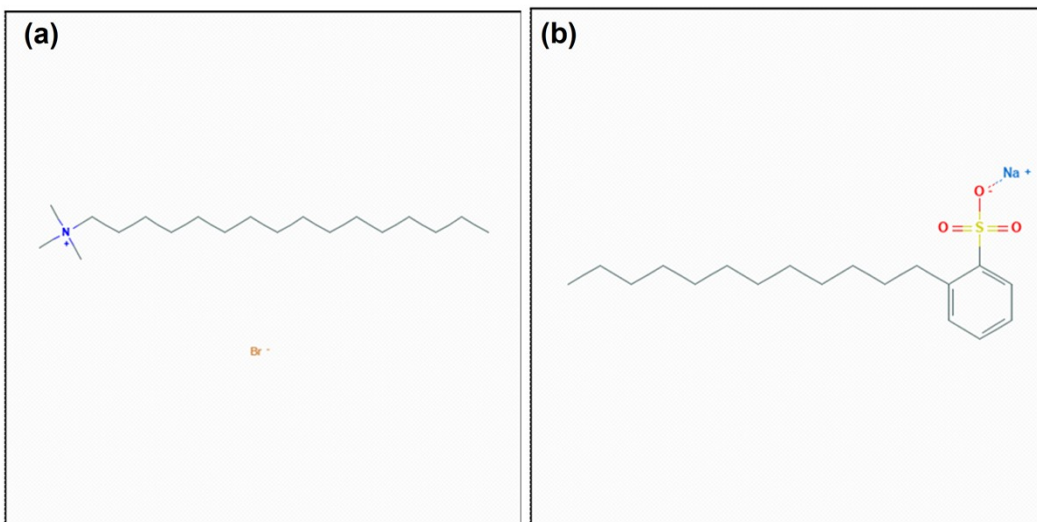

### Grafting density calculation

Figure S14: Structure of CTAB and SDBS ligands are depicted in Fig(a) and (b) respectively

‡Total CTAB attached to IONPs (analyzed by TOC analyzer) = 178.21 mg/L as OC

Total SDBS attached to IONPs = 256.57 mg/l as OC

The bilayer consists of oleic acid + CTAB/SDBS

The total number of carbon atoms in one entity of CTAB-IONP = 18C (oleic acid) + 19C(CTAB) = 37C

The total number of carbon atoms in one entity of SDBS-IONP = 18C (oleic acid) + 18C(SDBS) = 36C

Density of IONPs as magnetite = 5g/cm<sup>3</sup>

Assuming the diameter of 8 nm,

$$\text{Volume of one IONP} = \frac{4}{3}\pi r^3 = 2.68 \times 10^{-25} \text{ m}^3$$

$$\text{No. of IONPs in the solution} = \frac{\frac{\text{Mass of Fe from ICP - OES}}{\text{Density of IONP as magnetite}}}{\text{Volume of one IONP}}$$

$$\text{No. of IONPs in the CTAB-IONP solution} = 3.36 \times 10^{17}$$

No. of IONPs in the SDBS-IONP solution =  $4.31 \times 10^{17}$

Concentration of CTAB in the suspension =  $178.21 / (37 \times 12 \times 1000) = 0.000401\text{M}$

Concentration of SDBS in the suspension =  $256.57 / (36 \times 12 \times 1000) = 0.000594\text{M}$

1 mole contains  $6.022 \times 10^{23}$  entities, hence total number of CTAB entities in suspension =  $2.41 \times 10^{20}$

Total number of SDBS entities in suspension =  $3.57 \times 10^{20}$

Number of CTAB ligand attached to IONP = 718.2 per IONP

Number of SDBS ligand attached to IONP = 830.5 per IONP

## References

- 1 Rhamnolipid 1 | C<sub>32</sub>H<sub>58</sub>O<sub>13</sub> - PubChem <https://pubchem.ncbi.nlm.nih.gov/compound/5458394> (accessed Jun 16, 2020).
- 2 Rphdhd | C<sub>26</sub>H<sub>48</sub>O<sub>9</sub> - PubChem <https://pubchem.ncbi.nlm.nih.gov/compound/162246> (accessed Jun 16, 2020).
